# Supplementary material
Source: PubMed Central journal article supplement (PMC3710827)
Supplement: 1302553110_pnas.201302553SI.pdf [file 1302553110_pnas.201302553SI.pdf]

# Supporting Information

Maretzky et al. 10.1073/pnas.1302553110

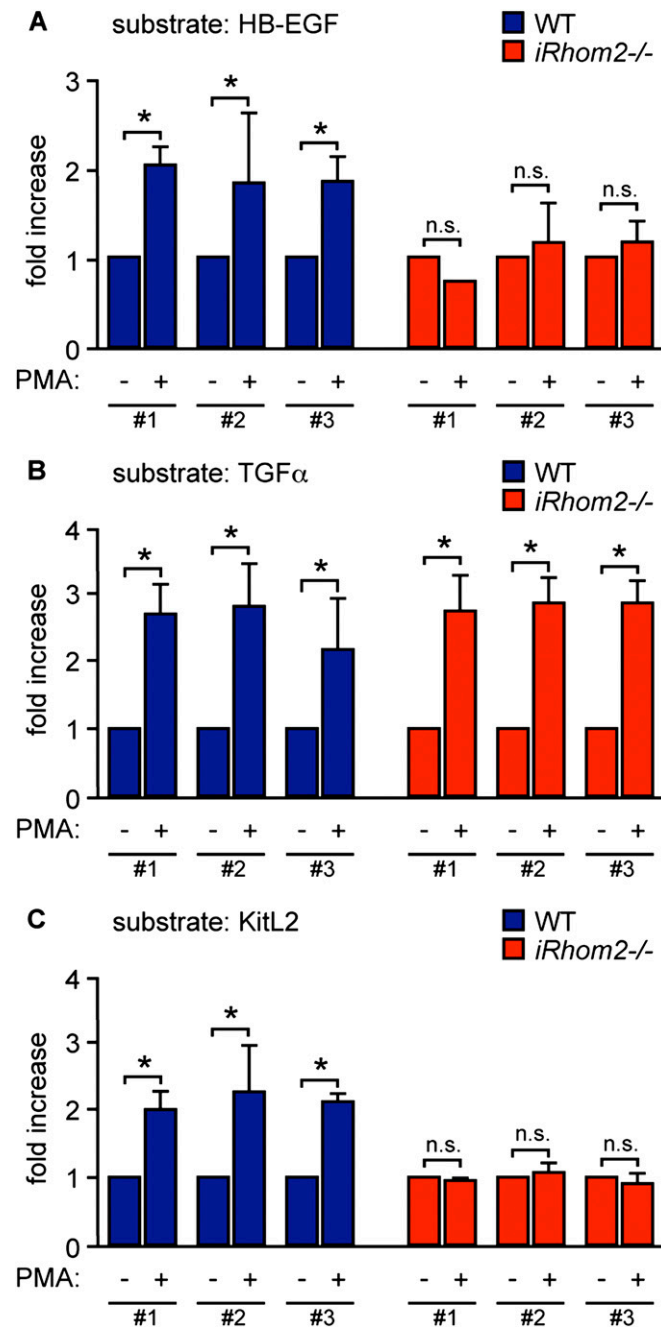

**Fig. S1.** Inactive rhomboid protein 2 (*iRhom2*) controls the stimulated shedding of heparin-binding (HB)-EGF and Kit ligand (KitL) 2, but not of TGF $\alpha$  in several independently isolated cultures of primary mouse embryonic fibroblasts (mEFs). (A–C) Three separately isolated cultures of primary wild-type (WT) or *iRhom2*<sup>-/-</sup> mEFs were transfected with the alkaline phosphatase (AP)-tagged ADAM17 (a disintegrin and metalloprotease 17) substrates HB-EGF (A), TGF $\alpha$  (B), or KitL2 (C) and stimulated for 30 min with 25 ng/mL phorbol-12-myristate-13-acetate (PMA). \* $P \leq 0.05$ ;  $\pm$ SEM ( $n = 3$ ).

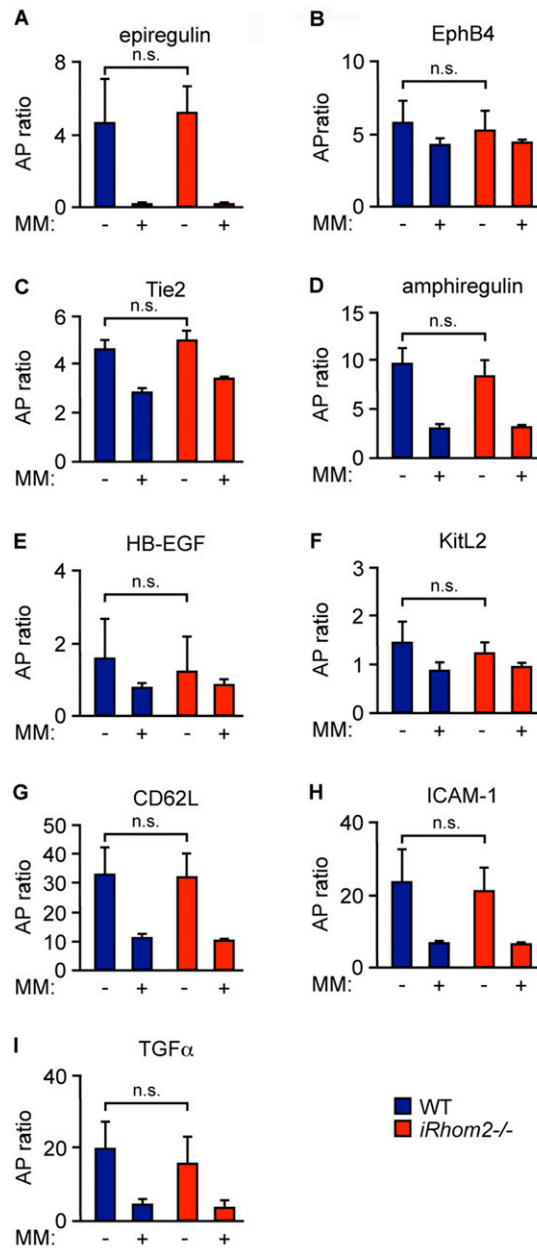

**Fig. S2.** The constitutive shedding of ADAM17 substrates is not significantly affected by the lack of *iRhom2*. WT or *iRhom2*<sup>-/-</sup> mEFs were transfected with the AP-tagged ADAM17 substrates epiregulin (A), Eph receptor B4 (EphB4) (B), Tie2 (C), amphiregulin (D), HB-EGF (E), KitL2 (F), CD62 ligand (CD62L) (G), intercellular adhesion molecule (ICAM)-1 (H), or TGF $\alpha$  (I), and constitutive shedding from cells incubated in the presence or absence of the metalloprotease inhibitor marimastat (MM) was measured after 4 h, as described in *Materials and Methods* ( $n = 3$ ;  $\pm$ SEM; n.s., not significantly affected).

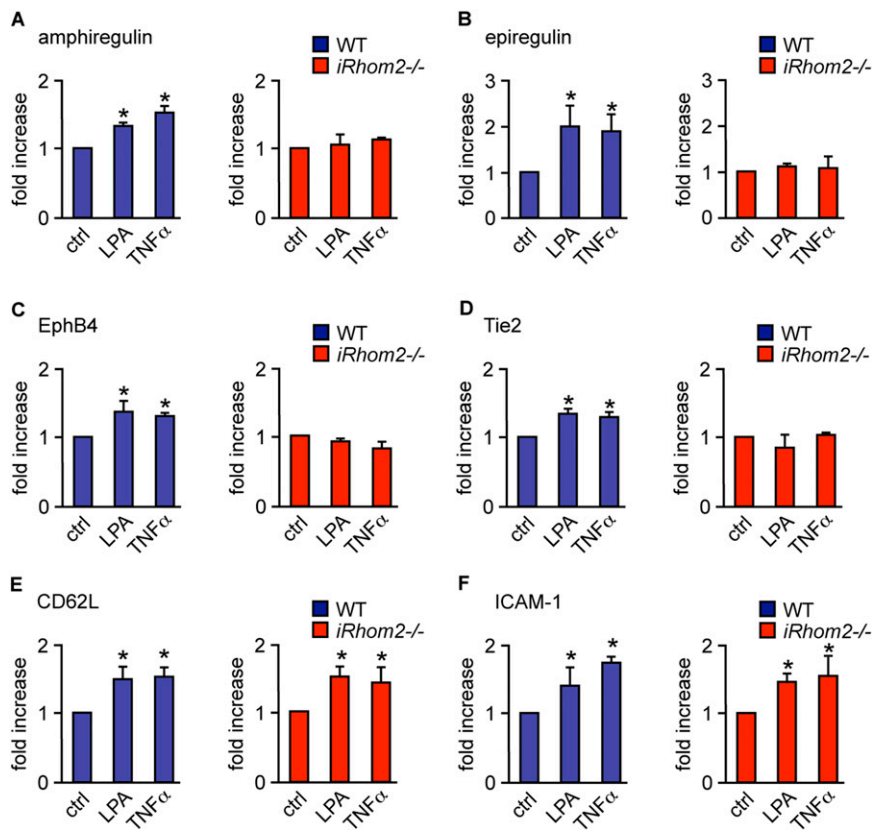

**Fig. S3.** *iRhom2* controls the LPA and TNF $\alpha$ -stimulated shedding of some substrates of ADAM17 (amphiregulin, epiregulin, EphB4, and Tie2) but not of other substrates of ADAM17 (CD62L, ICAM-1). WT or *iRhom2*<sup>-/-</sup> mEFs were transfected with the AP-tagged ADAM17 substrates amphiregulin (A), epiregulin (B), EphB4 (C), Tie2 (D), CD62L (E), or ICAM-1 (F) and stimulated for 30 min with LPA (10  $\mu$ M) or TNF $\alpha$  (10 ng/mL). Treatment with LPA or TNF $\alpha$  activated ADAM17-mediated shedding, as evidenced by the significantly increased cleavage of all of the tested substrates in WT mEFs. Identical experiments were performed with *iRhom2*<sup>-/-</sup> mEFs, in which stimulation for 30 min with LPA or TNF $\alpha$  did not increase the shedding of epiregulin, EphB4, Tie2, or amphiregulin but activated the release of CD62L and ICAM-1. Shedding was determined as described in *Materials and Methods*. \* $P \leq 0.05$ ;  $\pm$ SEM ( $n = 3$ ).

**A**

**TGF $\alpha$ /HB-EGF**      ■ = Transmembrane      \* = AP-tag

MVPSAGQLAL FALGIVLAAC QALENSTSPL SADPPVAAAV VSHFNDPCDS HTQFCFHGTC  
RFLVQEDKPA CVCHSGYVGA RCEHADLLAV VAASQKKQT<sup>\*</sup> ILAVVAVVLS VCLLVIVGLL  
LMERYHRRGGY DVENEKVKL GMTNSH

**HB-EGF/TGF $\alpha$**       ■ = Transmembrane      \* = AP-tag

MKLLPSVVLK LFLAAVLSAL VTGESLERLR RGLAAGTSNP DPPTVSTDQL LPLGGGRDRK  
VRDLQEADLD LLRVTLSKPK QAL<sup>\*</sup>ATPNKEE HGKRRKKKGK LGKKRDPCLR KYKDFCIHGE  
CKYVKELRAP SCICHPGYHG ERCHGLSLPV ENRLTYDHT AITALVVVSI VALAVLIITC  
VLIHCCQVRK HCEWCRALIC RHEKPSALLK GRTACCHSET VV

**TGF $\alpha$ /HB-EGF JM**      ■ = Transmembrane      \* = AP-tag

MVPSAGQLAL FALGIVLAAC QALENSTSPL SADPPVAAAV VSHFNDPCDS HTQFCFHGTC  
RFLVQEDKPA CVCHSGYVGA RCHGLSLPVE NR<sup>\*</sup>LYTYDHT ILAVVAVVLS SVCLLVIVGLL  
LMERYHRRGG YDVENEKVK LGMTNSH

**HB-EGF/TGF $\alpha$  JM**      ■ = Transmembrane      \* = AP-tag

MKLLPSVVLK LFLAAVLSAL VTGESLERLR RGLAAGTSNP DPPTVSTDQL LPLGGGRDRK  
VRDLQEADLD LLRVTLSKPK QAL<sup>\*</sup>ATPNKEE HGKRRKKKGK LGKKRDPCLR KYKDFCIHGE  
CKYVKELRAP SCICHPGYHG ERCEHADLLA VVAASQKKQA I<sup>\*</sup>TALVVVSI<sup>\*</sup> VALAVLIITCV  
LIHCCQVRKH CEWCRALICR HEKPSALLK RTACCHSETV V

**B**

**Chimera primers:**

**Universal**

EX FOR:                    CTTAACTGGCTTATCGAAATTAATAC  
EX FOR Nested:        ATACGACTCACTATAGGGAGACCCAAGCTT  
Cyto REV:                GTCGAGGCTGATCAGCGAGCTCTAGCA  
Cyto REV Nested:     GTGACACTATAGAATAGGGCCCTCTAGA

**TGF $\alpha$ /HB-EGF**

EX REV:                CACCACAGCCACCACGGCCAGGATGGTCTGCTTCTTCTGGCTGGCAGCCACCAC  
Cyto FOR:                TGTTGGCTGCCAGCCAGAAGAAGCAGACCATCCTGGCCGTGGTGGCTGTGGTG

**HB-EGF/TGF $\alpha$**

EX REV:                GGAGACCACCACCAAGGCGGTGATGGCTGTGTGGTCATAGGTATATAAGCGATT  
Cyto FOR:                AATCGCTTATATACCTATGACCACACAGCCATCACC<sup>\*</sup>CCCTGGTGGTGGTCTCC

**TGF $\alpha$ /HB-EGF JM**

EX REV:                TTCCACTGGGAGGCTCAGCCCATGACAGCGTGCACCAACGTACCCAGAATGGCA  
CYTO FOR:                TGCCATTCTGGGTACGTTGGTGCACGCTGTCATGGGCTGAGCCTCCAGTGAA

**HB-EGF/TGF $\alpha$  JM**

EX REV:                CACGGCCAGGAGTCCGCATGCTCACACCTCTCCTCATGGTAACCCGGGTGGCA  
CYTO FOR:                TGCCACCCGGTTACCATGGAGAGAGGTGTGAGCATGCGGACCTCCTGGCCGTG

**Fig. S4.** Chimera between TGF $\alpha$ -AP and HB-EGF-AP. (A) Table of the amino acid sequences of the TGF $\alpha$ -AP/HB-EGF-AP chimera expression constructs used in this study. Domain components for TGF $\alpha$  and HB-EGF are presented in blue and red, respectively. The transmembrane region is highlighted in yellow. Asterisks indicate the modified insertion site of the AP tag. (B) Primer sequences used for overlap extension PCR to generate the chimera between TGF $\alpha$ -AP and HB-EGF-AP.

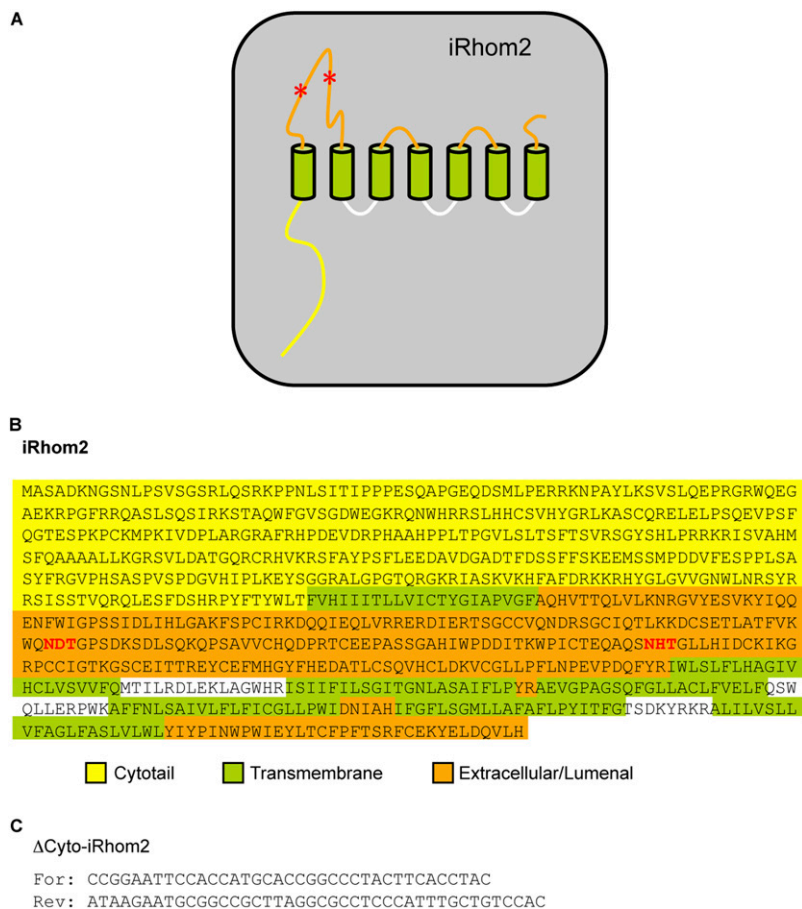

**Fig. S5.** Membrane topology and sequence of iRhom2. (A) Diagram of the predicted membrane topology of iRhom2, with asterisks indicating potential N-linked glycosylation sites in the extracellular loop of iRhom2. (B) Amino acid sequence of iRhom2 with the predicted N-terminal cytoplasmic domain highlighted in yellow, the predicted transmembrane domain highlighted in green, and the extracellular/luminal domains in orange, the potential N-linked glycosylation sites in the extracellular loop of iRhom2 in red, and the small cytoplasmic loops between transmembrane domains in white. (C) Primer sequences used for cytoplasmic domain-deletion mutant of iRhom2.
